# Supplementary material for: Antioxidant lipoic acid ligand-shell gold nanoconjugates against oxidative stress caused by α-synuclein aggregates
Source: Royal Society of Chemistry journal article supplement (doi:10.1039/d0na00688b), 2020-01-01
Supplement: d0na00688b1.pdf [file d0na00688b1.pdf]

# **ELECTRONIC SUPPLEMENTARY**

## **INFORMATION (ESI)**

### **Antioxidant Lipoic Acid Ligand-Shell Gold Nanoconjugates against Oxidative Stress Caused by $\alpha$ -Synuclein Aggregates**

Maria Elena Piersimoni<sup>a, b</sup>, Xiangyu Teng<sup>c</sup>, Anthony E. G. Cass<sup>b, c</sup> and Liming Ying<sup>a</sup>

<sup>a</sup>National Heart and Lung Institute, Imperial College London, Molecular Sciences Research Hub, London, W12 0BZ, United Kingdom.

<sup>b</sup>Bio Nano Consulting, London, W1T 4TQ, United Kingdom.

<sup>c</sup>Department of Chemistry, Imperial College London, Molecular Sciences Research Hub, London W12 0BZ, United Kingdom.

**Corresponding authors:** Liming Ying, E-mail: l.ying@imperial.ac.uk, Anthony E. G. Cass, E-mail: t.cass@imperial.ac.uk.

## Contents

|          |                                                                                 |          |
|----------|---------------------------------------------------------------------------------|----------|
| <b>1</b> | <b>Supplementary Methods .....</b>                                              | <b>3</b> |
| 1.1      | $\alpha$ -synuclein Expression and Purification.....                            | 3        |
| 1.2      | $\alpha$ -synuclein Labelling .....                                             | 3        |
| <b>2</b> | <b>Supplementary Results.....</b>                                               | <b>4</b> |
| 2.1      | Nanoparticle Characterization.....                                              | 4        |
| 2.2      | In Vitro Cytotoxicity Assay of Free Lipoic Acid and $\alpha$ -synuclein.....    | 5        |
| 2.3      | Cellular Uptake of free LA .....                                                | 5        |
| 2.4      | Mitochondrial Oxygen Consumption Rate (OCR) Measurement .....                   | 6        |
| 2.5      | Lipid Peroxidation Measurement of Free Lipoic Acid and $\alpha$ -synuclein..... | 7        |
| 2.6      | Nano-Mechanical Studies of SH-SY5Y Living Cells.....                            | 8        |
|          | .....                                                                           | 8        |
|          | .....                                                                           | 9        |
| 2.7      | Confocal Imaging of Microtubule Cytoskeleton of SH-SY5Y Living Cells.....       | 10       |

## **1 Supplementary Methods**

### **1.1 $\alpha$ -synuclein Expression and Purification**

$\alpha$ -synuclein was expressed using BL21(DE3) E. coli following the published method<sup>1</sup>. In brief, cells were grown in LB in the presence of ampicillin (100  $\mu$ g/ml) at 37 °C. When the absorbance at 600 nm ( $OD_{600}$ ) reached 0.5, the expression was induced by the addition of 1 mM IPTG for 3 h at 37 °C. Cells were then harvested by centrifugation in a Beckman Avanti J-26 XP centrifuge with a JLA-10.500 rotor (Beckman Coulter, California, USA) at 8000 g for 30 min. The cell pellet was resuspended in 20 mM Tris-HCl (pH 7.4), 5 mM EDTA, 1 mM protease inhibitor (cOmplete Protease Inhibitor Cocktail, Roche, Basel, Switzerland) and lysed by sonication for 2 min. Subsequently, the cell suspension was boiled at 90 °C for 20 min and then centrifuged at 16000 g with a VWR Micro Star 17 micro-centrifuge (VWR International, Pennsylvania, USA) for 20 min. The supernatant was collected and filtered with an Acrodisc 0.2  $\mu$ m 25mm syringe filter (Pall Corporation, New York, USA) to remove all cell debris. After that, streptomycin sulfate was added to the supernatant to a final concentration of 10 mg/ml, and the mixture was stirred for 15 min at 4 °C. After centrifugation at 16000 g for 20 min, the supernatant was collected, and ammonium sulfate was added to 50% saturation. The mixture was stirred for 30 min at 4 °C and centrifuged again at 16000 g. The pellet was collected and resuspended in 20 mM Tris-HCl (pH 7.4), 50 mM NaCl and dialyzed overnight against 2 L of the same buffer. Protein concentration was determined from the absorbance at 280 nm with an extinction coefficient of 5960  $M^{-1} cm^{-1}$  using a PerkinElmer Lambda 25 UV/Vis spectrometer (PerkinElmer, Massachusetts, USA).

### **1.2 $\alpha$ -synuclein Labelling**

Dye-labelling of  $\alpha$ -synuclein was achieved via a selective thiol-maleimide reaction. First, a cysteine mutation at position 7 was introduced to the wild-type protein, which is the only cysteine residue in the  $\alpha$ -synuclein mutant that will conjugate to the Fluor 647 C<sub>2</sub> maleimide (Thermo Fisher Scientific, Massachusetts, USA). Prior to the reaction, 20 mM Tris-HCl (pH 7.4), 50 mM NaCl buffer was deoxygenated by bubbling with nitrogen for 1 h. Protein solution was thawed on ice, and a 10-fold molar excess of TCEP was added in protein solution to reduce disulfide bonds. Next, protein solution was eluted with the bubbled buffer through a PD-10 desalting column containing Sephadex G-25 resin (GE Healthcare Life Sciences, Illinois, USA) to remove TCEP. The concentration of eluted protein solution was determined from the absorbance at 280 nm, using an extinction coefficient of 5960  $M^{-1} cm^{-1}$ . Subsequently, dye solution in DMSO was added to the eluted protein solution in a molar ratio of 3: 1 (dye: protein). The mixture was stirred in dark for 3 h. Then the mixture containing labelled protein was desalted and concentrated at 15000 g for 5 min, using 10K MWCO pierce protein concentrators (Thermo Fisher Scientific, MA, USA). The purified samples were stored at -80 °C. The final concentration of labelled  $\alpha$ -synuclein was determined from the absorbance at 650 nm with an extinction coefficient of 239000  $M^{-1} cm^{-1}$ . The total concentration of protein was

calculated using **Equation 1** below (0.03 is a correction factor for the fluorophore's contribution to the  $A_{280}$ ):

$$\text{Protein concentration (M)} = \frac{A_{280} - 0.03(A_{650})}{\text{molar } \epsilon \text{ of protein at 280 nm}} \quad (1)$$

From the ratio of the concentration of labelled and total protein, the labelling efficiency was determined to be 95%.

## 2 Supplementary Results

### 2.1 Nanoparticle Characterization

**Table S1.** Characterization of GNPs, GNPs-LA and GNPs- $\alpha$ -Syn by DLS (Dynamic Light Scattering) and Zeta Potential measurements. Data are represented as mean  $\pm$  standard deviation,  $n = 3$ .

| Type of nanoparticles | Hydrodynamic diameter (nm) | Polydispersity Index (PDI) | Zeta Potential (mV) |
|-----------------------|----------------------------|----------------------------|---------------------|
| Bare GNPs             | 20                         | 0.18                       | $-53.6 \pm 2$       |
| GNPs-LA               | 40                         | 0.23                       | $-35 \pm 1$         |
| GNPs- $\alpha$ -Syn   | 60                         | 0.20                       | $-14 \pm 2$         |

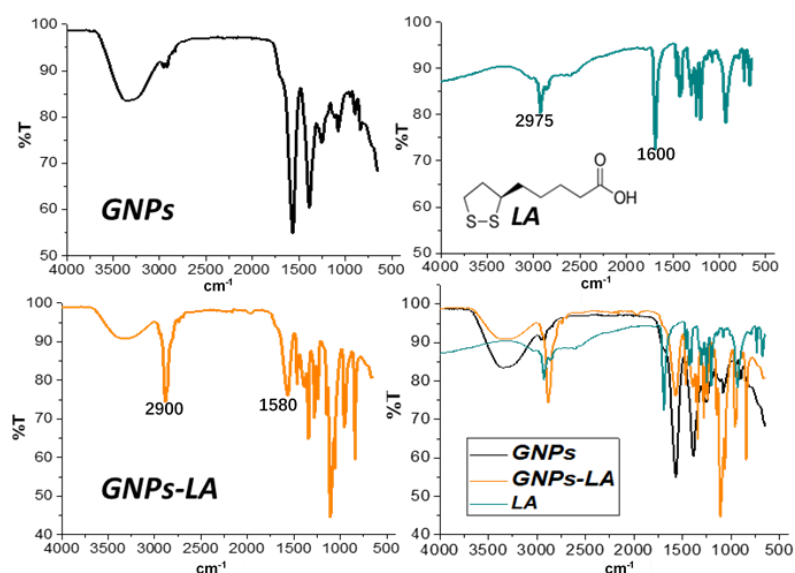

**Fig S1.** FTIR characterization of GNPs, LA and GNPs-LA. FTIR analysis was carried out on GNPs and GNPs-LA to further confirm the presence of the shell of lipolic acid on the nanoparticles. The spectra were analyzed in two major regions; after the coupling reaction, two main stretching that represent the footprint of lipolic acid appeared: one main peak at  $2900 \text{ cm}^{-1}$  and the other one at  $1580 \text{ cm}^{-1}$  which correspond to methylene and carbonyl stretching, respectively.

## 2.2 In Vitro Cytotoxicity Assay of free Lipoic Acid and $\alpha$ -synuclein

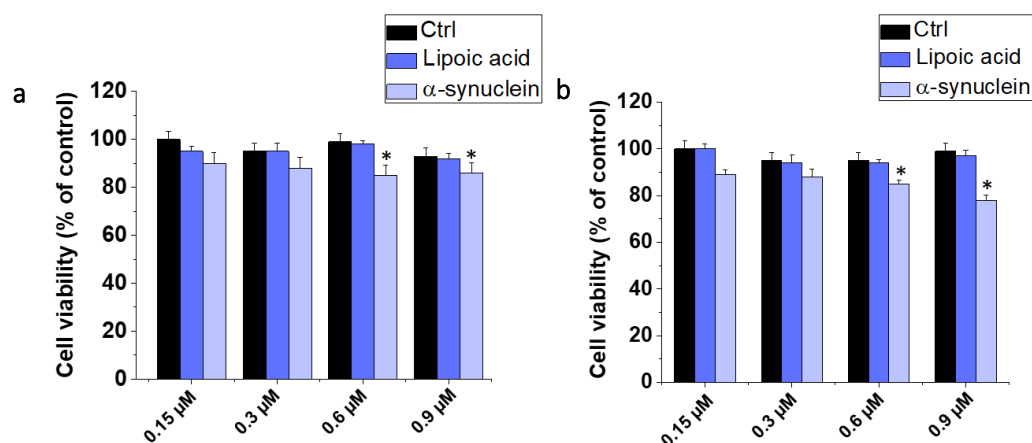

**Fig S2.** In vitro cytotoxicity assay of free lipoic acid (LA) and free  $\alpha$ -synuclein. (a) SH-SY5Y neuroblastoma cell line was exposed to increasing concentration of LA and  $\alpha$ -synuclein for 24 h and (b) 72 h. The cell viability, expressed in % in respect to the control of untreated SH-SY5Y cells (Ctrl), was assessed by MTT assay. Data are expressed as mean  $\pm$  SEM,  $n = 3$ . \* $P < 0.05$  in respect to the Ctrl.

## 2.3 Cellular Uptake of free LA

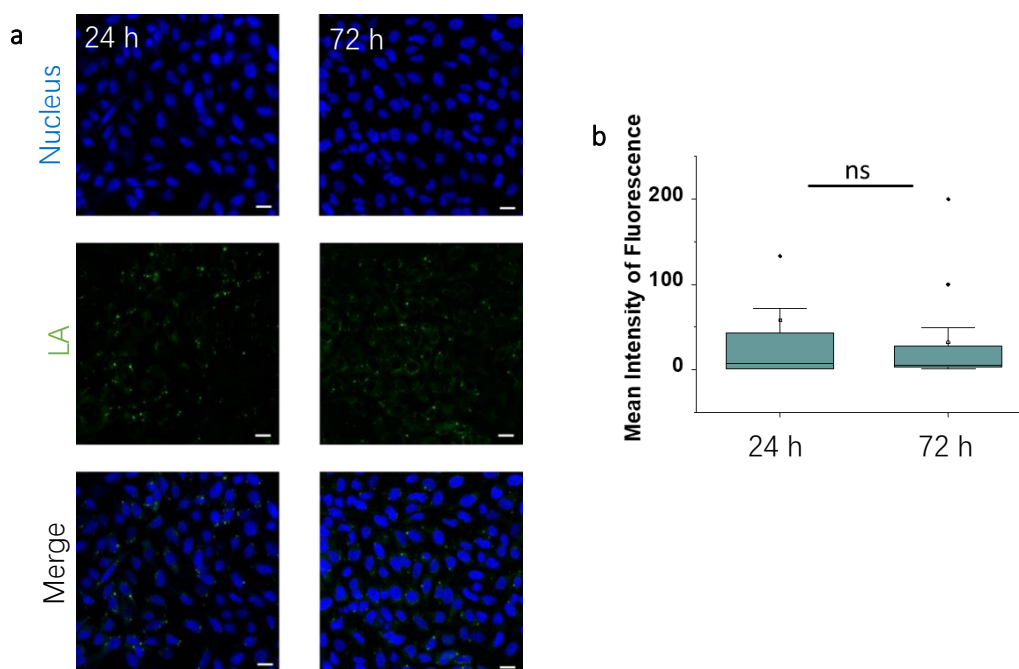

**Fig S3.** Intracellular uptake and distribution of 0.6  $\mu$ M free LA. (a) Live SH-SY5Y cells were exposed to LA 24 h and 72 h prior to imaging by confocal microscopy. The nucleus is visualized in blue and lipoic acid in green (AlexaFluor 647 label). Scale bar = 10  $\mu$ m. (b) The mean fluorescence intensity of LA by confocal microscopy in SH-SY5Y cells after 24 h and 72 h LA exposure. Data are given as mean  $\pm$  SEM;  $n=3$ . Ns, not significant.

## 2.4 Mitochondrial Oxygen Consumption Rate (OCR) Measurement

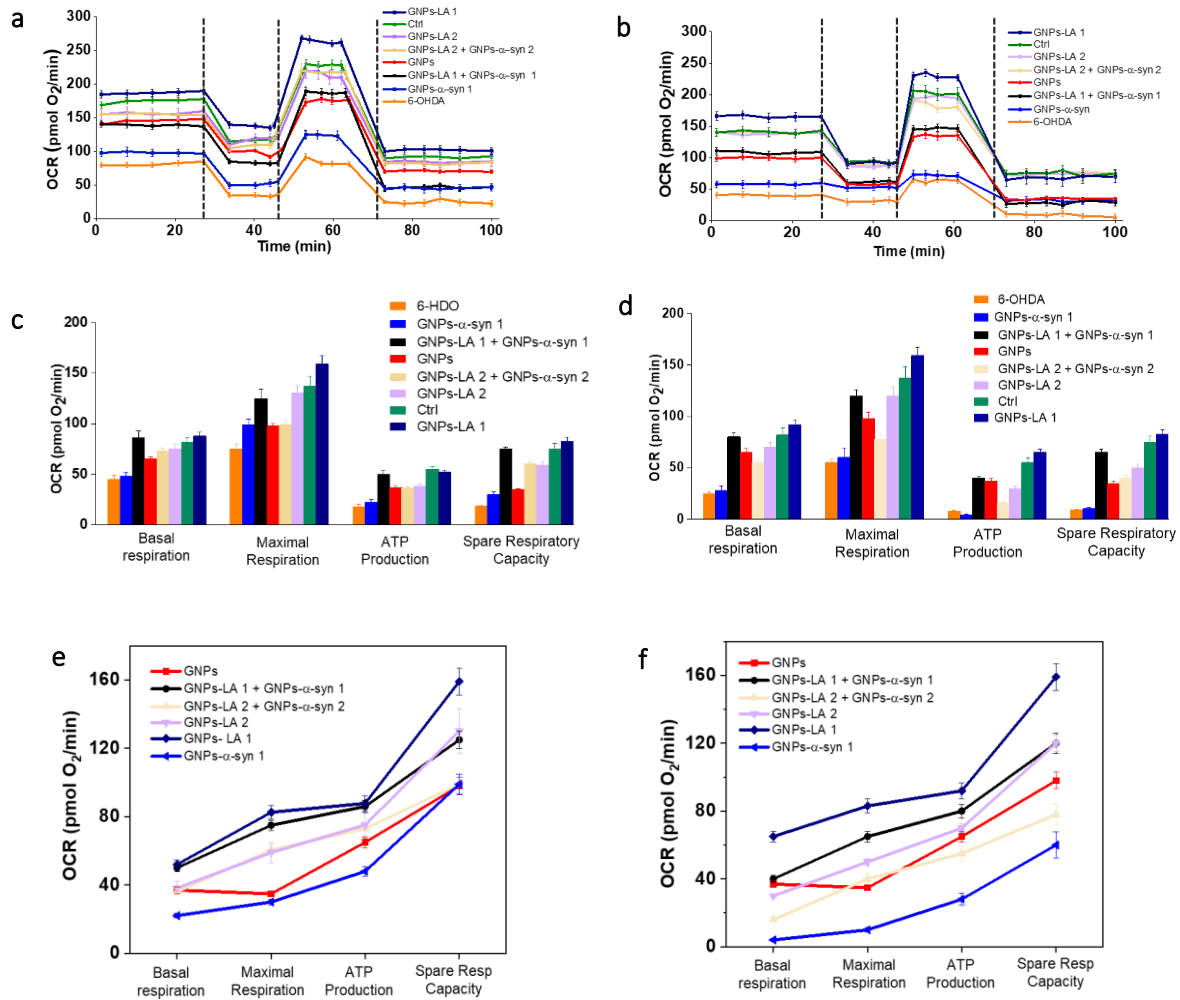

**Fig S4.** Mitochondrial oxygen consumption rate (OCR) measurement by SeahorseXFe96 in SH-SY5Y live cells. **(a-b)** OCR throughout mitochondrial function testing of SH-SY5Y after 24 h and 72 h exposure to either vehicle (Ctrl), GNPs-LA 1 (60  $\mu$ g/ml) and 2 (30  $\mu$ g/ml), GNPs- $\alpha$ -Syn (60  $\mu$ g/ml), GNPs (60  $\mu$ g/ml), GNPs-LA 1-2 (60 and 30  $\mu$ g/ml)/GNPs- $\alpha$ -Syn 1-2 (60 and 90  $\mu$ g/ml) mixture and 6-hydroxydopamine (6-OHDA). **(c-d)** Basal Respiration, Maximal Respiration, ATP Production and Spare Respiratory Capacity were calculated from OCR of SH-SY5Y live cells exposed for 24 h and 72 h to either vehicle (Ctrl), GNPs-LA 1 (60  $\mu$ g/ml) and 2 (30  $\mu$ g/ml), GNPs- $\alpha$ -Syn (60  $\mu$ g/ml), GNPs (60  $\mu$ g/ml), GNPs-LA 1-2 (60 and 30  $\mu$ g/ml)/GNPs- $\alpha$ -Syn 1-2 (60 and 90  $\mu$ g/ml) mixture and 6-hydroxydopamine (6-OHDA). Values are reported as mean  $\pm$  SEM (n=12 per group). **(e-f)** Effect of 24 h and 72 h exposure of GNPs (60  $\mu$ g/ml), GNPs-LA 1 (60  $\mu$ g/ml) and 2 (30  $\mu$ g/ml), GNPs- $\alpha$ -Syn (60  $\mu$ g/ml), GNPs-LA 1-2/GNPs- $\alpha$ -Syn 1-2 on mitochondrial function parameters in SH-SY5Y living cells.

## 2.5 Lipid Peroxidation Measurement of Free Lipoic Acid and $\alpha$ -synuclein

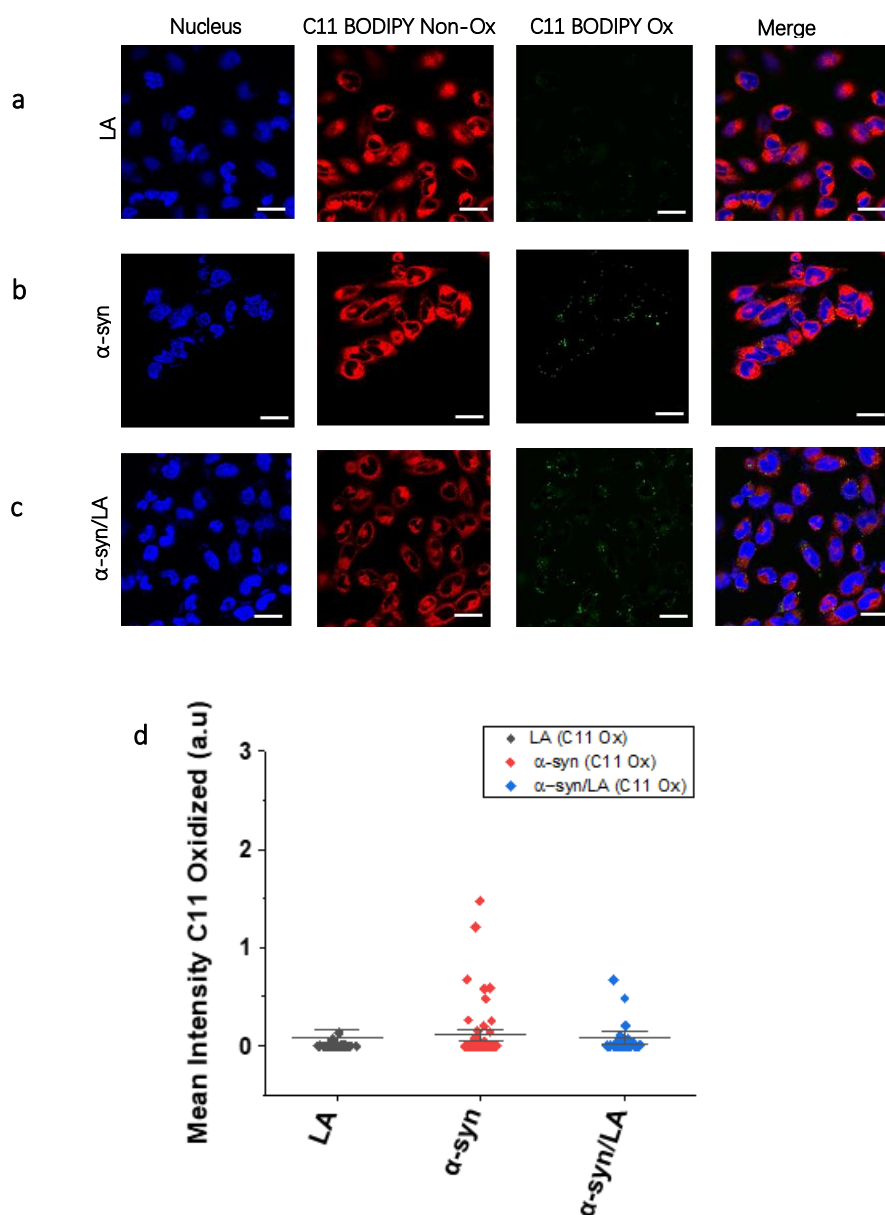

**Fig S5.** Lipid peroxidation measurements using C11 BODIPY (shift of fluorescent emission peak from 590 nm red to 510 nm green). (a) Lipid peroxidation levels after SH-SY5Y cells exposure to 0.6  $\mu$ M of LA and (b) 0.6  $\mu$ M  $\alpha$ -Syn and (c) 0.3  $\mu$ M each  $\alpha$ -Syn/LA together prior to imaging by confocal microscopy. The nucleus is visualized in blue. Scale bar = 10  $\mu$ m. (d) The mean fluorescence intensity of the shift of the emission peak from non-oxidized (red) to oxidized (green) for each experiment. Data are given as mean  $\pm$  SEM; n=3.

## 2.6 Nano-Mechanical Studies of SH-SY5Y Living Cells

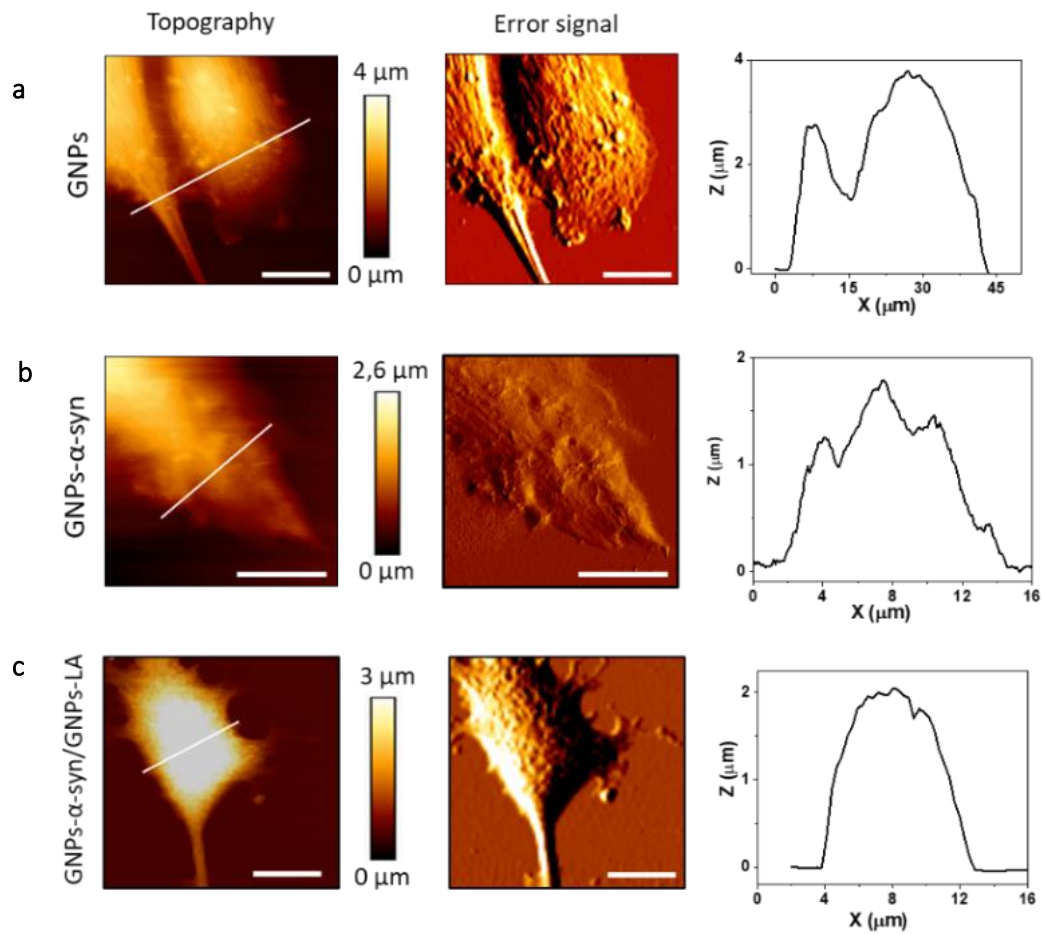

**Fig S6:** (a) Topographic AFM images and error images of SH-SY5Y living cells exposed to 60  $\mu\text{g}/\text{ml}$  GNPs, (b) 60  $\mu\text{g}/\text{ml}$  GNPs-LA and (c) 60  $\mu\text{g}/\text{ml}$  of GNPs- $\alpha$ -Syn (30  $\mu\text{g}/\text{ml}$ ) /GNPs-LA (30  $\mu\text{g}/\text{ml}$ ) mixture. Corresponding cells height profile across the lines in the topographic AFM images on the right panel. Scale bar = 10  $\mu\text{m}$ .



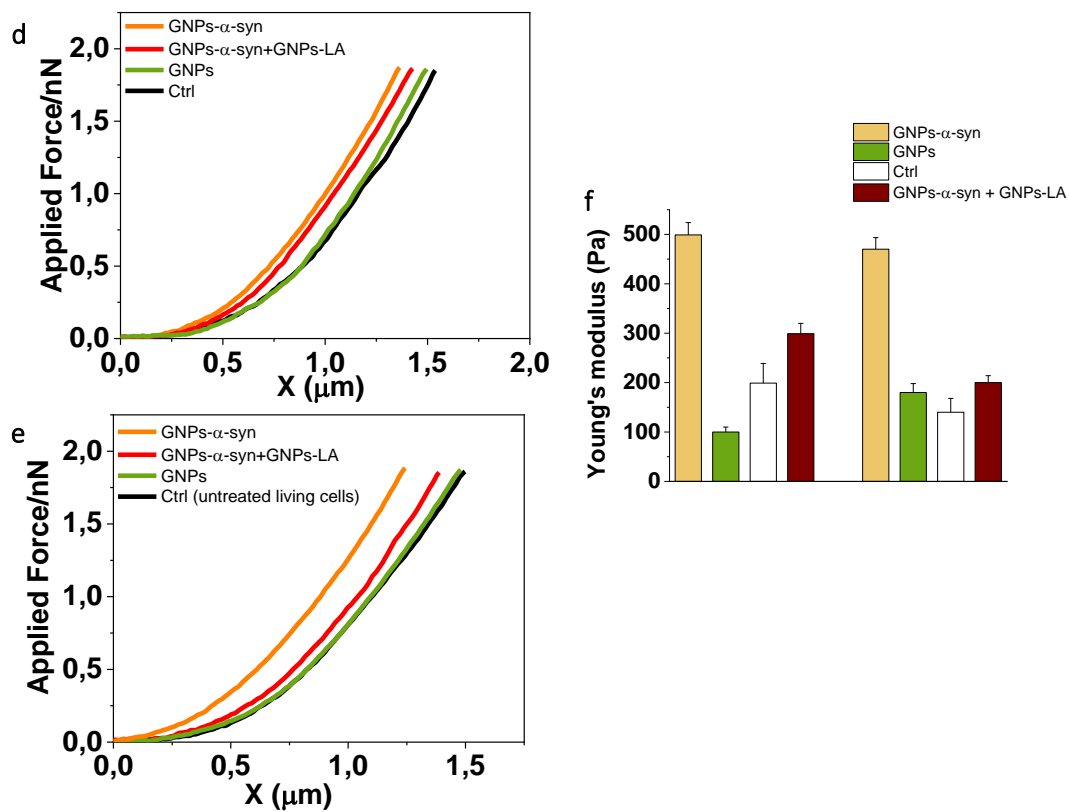

**Fig S7.** (d-e) Examples of force-indentation experimental curves recorded for both untreated (Ctrl) and treated SH-SY5Y live cells. SH-SY5Y live cells were exposed to 60 μg/ml GNPs, 60 μg/ml GNPs-α-Syn and 60 μg/ml of GNPs-LA/GNPs-α-Syn (30 μg/ml each) mixture for 24 h and 72 h. (f) Young's modulus mean value obtained from AFM measurements on SH-SY5Y living cells after the exposure to GNPs-α-Syn, GNPs and the mixture GNPs-α-Syn/GNPs-LA for 24 h (left) and 72 h (right). Error bars represent the standard error of the mean for each condition.

## 2.7 Confocal Imaging of Microtubule Cytoskeleton of SH-SY5Y Living Cells

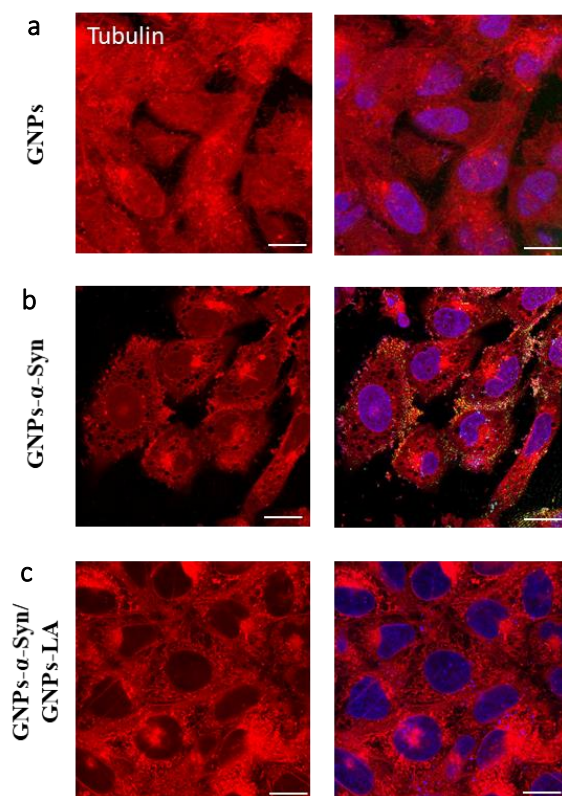

**Fig S8.** Changes in the microtubule cytoskeleton induced by 72 h exposure to the nanoparticles investigated by confocal imaging using SiR-Tubulin protein. (a) SH-SY5Y cells treated with 60 $\mu$ g/ml GNPs. (b) and (c) are SH-SY5Y treated with 60  $\mu$ g/ml GNPs- $\alpha$ -Syn and 60  $\mu$ g/ml GNPs- $\alpha$ -Syn/GNPs-LA (30  $\mu$ g/ml each) mixture. Scale bar = 10  $\mu$ m.

### Reference

1. W. Hoyer, T. Antony, D. Cherny, G. Heim, T. Jovin, V. Subramaniam, Dependence of  $\alpha$ -Synuclein aggregate Morphology on Solution Conditions, *J. Mol. Biol.*, 2002, 322, 383–393.
